# Supplementary material
Source: PubMed Central journal article supplement (PMC2238800)

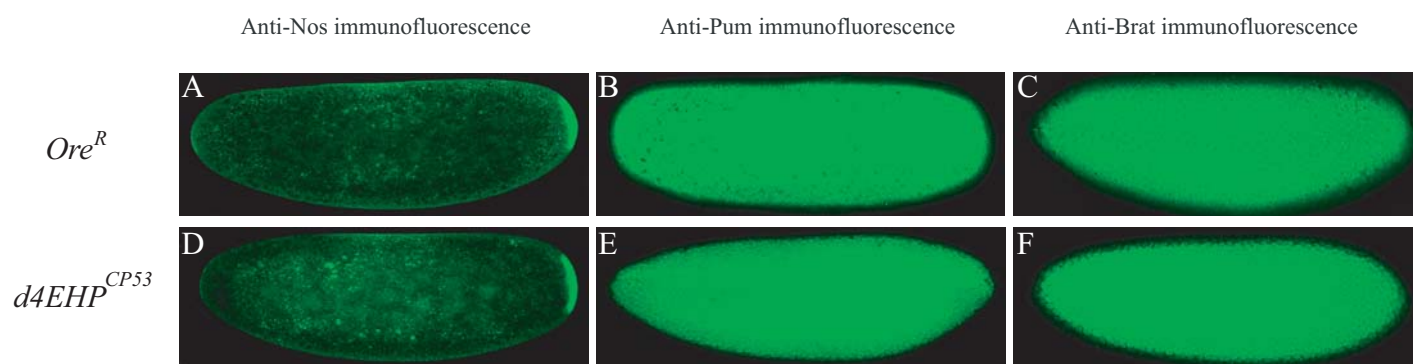

**A**

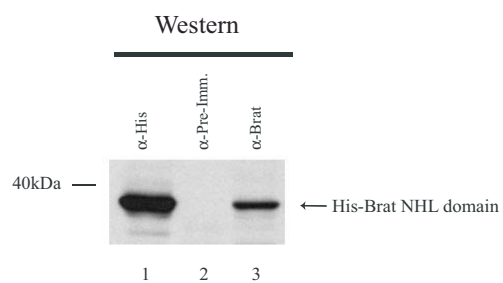

**B**

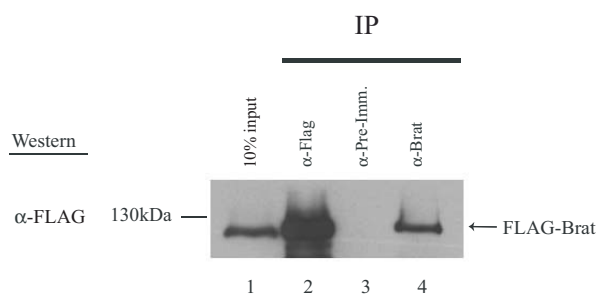

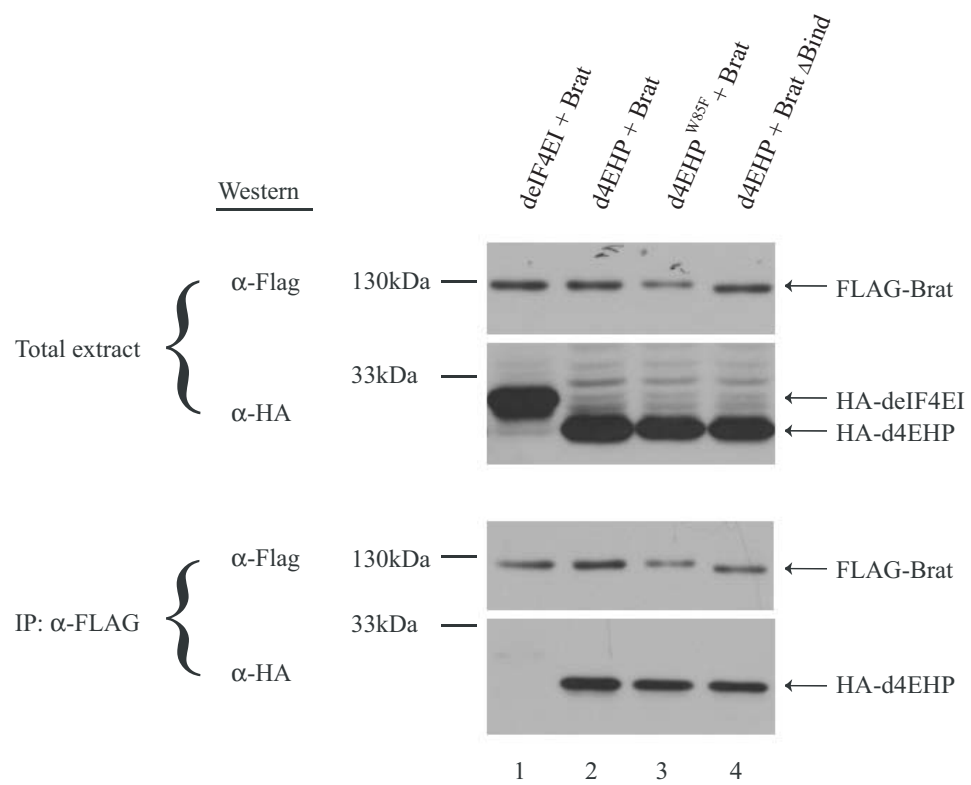

Cho et al. Supplemental Fig. 3

Supplement: NIHMS13335-supplement-01.pdf [file NIHMS13335-supplement-01.pdf]
